# Supplementary material for: Positive Effects against UV-A Induced Damage and Oxidative Stress on an In Vitro Cell Model Using a Hyaluronic Acid Based Formulation Containing Amino Acids, Vitamins, and Minerals
Source: Hindawi journal article supplement (doi:10.1155/2018/8481243), 2018-06-26
Supplement: f1 [file 8481243.f1.docx]

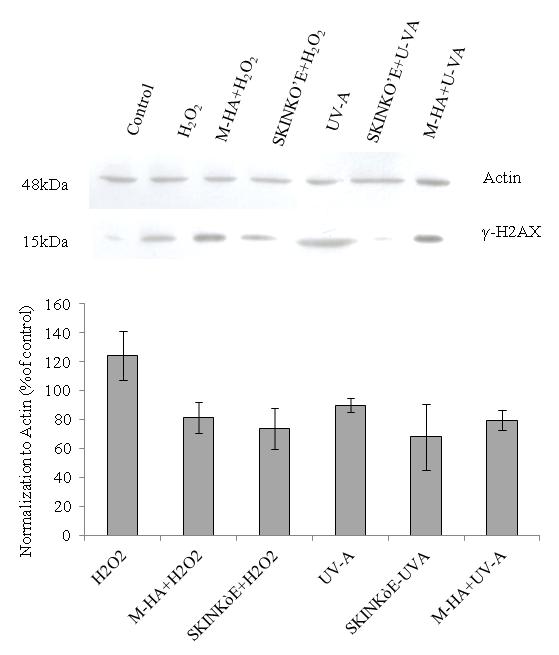


**Supplementary file:** Western blotting analyses relative to γ-H2AX protein evaluated as biomarkers of DNA damage following oxidative stress. M-HA and Skinkò support a lower damage on HaCat cells to both H2O2 and UV-A induced stress.
